# Supplementary material for: Philanthropy for global mental health 2000–2015
Source: PubMed Central journal article supplement (PMC7379329; doi:10.1017/gmh.2020.2), 2020-05-06
Supplement: S2054425120000023sup001.pdf [file S2054425120000023sup001.pdf]

## Supplementary appendix

Supplement to: Lemmi V (2020). Philanthropy for global mental health 2000–2015. *Global Mental Health* 1–6. <https://doi.org/10.1017/gmh.2020.2>

### Supplementary appendix

|                                                                                                                                                                         |    |
|-------------------------------------------------------------------------------------------------------------------------------------------------------------------------|----|
| Appendix 1. Data sources and analyses.....                                                                                                                              | 2  |
| Appendix 2. Annual philanthropic DAMH and annual philanthropic DAH between 2000 and 2015 (million, 2017 US\$) and as proportion of annual total DAMH and DAH.....       | 5  |
| Appendix 3. Annual philanthropic DAH for mental health and other health conditions between 2000 and 2015 (million, 2017 US\$).....                                      | 6  |
| Appendix 4. Annual philanthropic DAMH and annual philanthropic DAH between 2000 and 2015, by channel organisation (million, 2017 US\$).....                             | 7  |
| Appendix 5. Cumulative philanthropic DAMH by the top 10 US foundations as channels between 2000 and 2015, by region and country income group (thousand, 2017 US\$)..... | 8  |
| Appendix 6. Cumulative philanthropic DAMH and philanthropic DAH between 2000 and 2015, by region, country income group, country (thousand, 2017 US\$).....              | 11 |

## Appendix 1. Data sources and analyses

### Data sources

I merged the Institute of Health Metrics and Evaluation (IHME) dataset on development assistance for health (DAH) 1990-2017 (IHME, 2018) with three variables: country classification per region (WHO, 2018), per country income-level (World Bank, 2018), and country population size (Global Burden of Disease Collaborative Network, 2018). DAH includes “in-kind and financial resources transferred from primary development channels to low-income and middle-income countries for the purpose of maintaining or improving health” (Dieleman *et al.*, 2016, p. 2537).

The IHME DAH dataset reports semi-aggregated data on DAH in 172 countries between 1990 and 2017 (IHME, 2018). It reports estimates on resource flows from funding sources (Table 1), through *channel* organisations, defined as intermediary organisations disbursing funding to implementing institutions providing support in low- and middle-income countries (Table 2). The dataset is built by IHME using different sources: Development Assistance Committee and Creditor Reporting System databases (Organisation for Economic Co-operation and Development), financial reports, audited financial statements, United States Agency for International Development Report of Voluntary Agencies, Foundation Center’s grant database, Bill & Melinda Gates Foundation online grant database, Internal Revenue Service 990 tax forms, and personal correspondences (Global Burden of Disease Health Financing Collaborator Network, 2018).

These data, in an aggregated form, exists publically on the Global Health Data Exchange (IHME, 2018). A detailed dataset was obtained from IHME in September 2018, including values omitted in the publicly available dataset (i.e. values greater than US\$0 but less than US\$500, or less than US\$0 and greater than -US\$500). In addition, disaggregated data for United States foundations (variable *channel*, category *Other US Foundations* in Table 2) were obtained in June 2018.

It is worth noting that development assistance for mental health in the IHME DAH dataset captures not only mental disorders (including substance use disorders, dementia, and self-harm) but also some neurological conditions (epilepsy, headache disorders, Parkinson’s disease). This reflects previous conceptualisations of mental disorders (WHO, 2008). At the time of the analyses for this paper it was not possible to access data on development assistance for mental health excluding those neurological conditions.

**Table 1.** *Funding sources*

| <b>Donors</b>                              | <b>Description</b>                                                                                                                                                                                                              |
|--------------------------------------------|---------------------------------------------------------------------------------------------------------------------------------------------------------------------------------------------------------------------------------|
| Governments (OECD DAC members)             | Australia; Austria; Belgium; Canada; Denmark; Finland; France; Germany; Greece; Ireland; Italy; Japan; Korea; Luxembourg; Netherlands; New Zealand; Norway; Portugal; Spain; Sweden; Switzerland; United Kingdom; United States |
| Governments (non OECD DAC members)         | United Arab Emirates                                                                                                                                                                                                            |
| <b>Bill &amp; Melinda Gates Foundation</b> | Contribution from the Bill & Melinda Gates Foundation to NGOs                                                                                                                                                                   |

| <b>Donors</b>              | <b>Description</b>                                                                                                                    |
|----------------------------|---------------------------------------------------------------------------------------------------------------------------------------|
| <b>Corporate donations</b> | Private sector in-kind contributions to NGOs                                                                                          |
| <b>Private (other)</b>     | Private sector financial contributions, including corporations, foundations (within and outside the United States), individuals, etc. |
| Debt repayments            | Debt repayments (World Bank; regional development banks)                                                                              |
| Other                      | Interest, transfer of funds, refunds, miscellaneous income earned by channel                                                          |
| Unallocable                | Unspecified donor sector                                                                                                              |

Adapted from the dataset user guide (IHME, 2018). NGOs, non-governmental organisations; OECD DAC, Organisation for Economic Co-operation and Development's Development Assistance Committee. Bold: philanthropic donors included in the analyses.

**Table 2.** Channel organisations

| <b>Channel type</b>                           | <b>Organisations</b>                                                                                                                                                                                                                                  |
|-----------------------------------------------|-------------------------------------------------------------------------------------------------------------------------------------------------------------------------------------------------------------------------------------------------------|
| Bilateral governmental organisations          | Australia; Austria; Belgium; Canada; Denmark; Finland; France; Germany; Greece; Ireland; Italy; Japan; Korea; Luxembourg; Netherlands; New Zealand; Norway; Portugal; Spain; Sweden; Switzerland; United Arab Emirates; United Kingdom; United States |
| Multilateral organisations                    | European Commission; Pan-American Health Organization; Joint United Nations Programme on HIV/AIDS; United Nations Population Fund; United Nations Children's Fund; World Health Organization                                                          |
| Multilateral Development Finance Institutions | African Development Bank; Asian Development Bank; Inter-American Development Bank; World Bank, International Bank for Reconstruction and Development; World Bank, International Development Association                                               |
| <b>Foundations</b>                            | Bill & Melinda Gates Foundation; Other United States Foundations                                                                                                                                                                                      |
| Non-Governmental Organisations                | Sample of United States-based and internationally based non-governmental organisations receiving support from the United States government                                                                                                            |
| Global Health Initiatives                     | Gavi, the Vaccine Alliance; Global Fund to Fight AIDS, Tuberculosis, and Malaria; Unitaid                                                                                                                                                             |

Adapted from the dataset user guide (IHME, 2018). Bold: philanthropic donors included in the additional disaggregated dataset.

## Analyses

I conducted descriptive analyses of annual philanthropic development assistance for mental health (DAMH) in absolute and relative terms, by channel organisation, by recipient country, and compared with philanthropic DAH to other health conditions (HIV/AIDS, tuberculosis, malaria, other infectious diseases, maternal health, newborn and child health, non-communicable diseases excluding mental health). Philanthropic donors included in the analyses are corporations, foundations, individuals (Table 1-2). Analyses were limited to 2000-2015, due to poor data quality pre-2000, preliminary estimates post-2015 and to focus on the Millennium Development Goals era to inform the Sustainable Development Goals (SDGs) era, leaving 168 countries.

I excluded 12 small overseas territories or dependencies due to lack of World Bank country classification: Anguilla, Cook Islands, Mayotte, Montserrat, Nauru, Niue, Saint Helena, Saint Martin, Tokelau, Turks and Caicos Islands, Tuvalu, Wallis and Futuna Islands. None of them received philanthropic DAMH. Only two countries received non-philanthropic DAMH during the period, Anguilla (2005) and the Cook Islands (2005-2006 and 2008-2012). To reflect disbursements to recipient countries dissolved or created during the period of study (Kosovo, Serbia, South Sudan), the World Bank country classification was imputed using the first observation carried backward and the last observation carried forward.

Transfers between channels captured elsewhere in the database were excluded to avoid double-counting. Values are reported in 2017 United States dollars (US\$) adjusted by purchasing-power parity. Analyses were conducted in Stata 14.

## References

- Dieleman JL, Schneider MT, Haakenstad A, Singh L, Sadat N, Birger M, Reynolds A, Templin T, Hamavid H, Chapin A, Murray CJ** (2016). Development assistance for health: past trends, associations, and the future of international financial flows for health. *The Lancet* **387**, 2536–2544.
- Global Burden of Disease Collaborative Network** (2018a). Global Burden of Disease Study 2017 (GBD 2017) Population Estimates 1950-2017. Seattle: Institute for Health Metrics and Evaluation. (<http://ghdx.healthdata.org/record/global-burden-disease-study-2017-gbd-2017-population-estimates-1950-2017>). Accessed 27 August 2019.
- Global Burden of Disease Health Financing Collaborator Network** 2018. Spending on health and HIV/AIDS: domestic health spending and development assistance in 188 countries, 1995-2015. *The Lancet* **391**, 1799–1829.
- IHME** (2018a). Development Assistance for Health Database 1990-2017. Seattle: Institute for Health Metrics and Evaluation. (<http://ghdx.healthdata.org/record/ihme-data/development-assistance-health-database-1990-2017>). Accessed 27 August 2019.
- WHO** (2008). mhGAP Mental Health Gap Action Programme. Scaling Up Care for Mental, Neurological, and Substance Use Disorders. Geneva: World Health Organization.
- WHO** (2018a). Global Health Observatory (GHO) Data. Geneva: World Health Organization. (<https://www.who.int/gho/database/en/>). Accessed 27 August 2019.
- World Bank** (2018). World Bank Country and Lending Groups (June 2018 edition). Washington DC: The World Bank. (<https://datahelpdesk.worldbank.org/knowledgebase/articles/906519-world-bank-country-and-lending-groups>). Accessed 27 August 2019.

**Appendix 2. Annual philanthropic DAMH and annual philanthropic DAH between 2000 and 2015 (million, 2017 US\$) and as proportion of annual total DAMH and DAH**

|              | Philanthropic DAMH |              | Philanthropic DAH |             |
|--------------|--------------------|--------------|-------------------|-------------|
|              | US\$ (million)     | % Total DAMH | US\$ (million)    | % Total DAH |
| <b>2000</b>  | 20.0               | 29.5%        | 2,053.6           | 17.1%       |
| <b>2001</b>  | 18.8               | 27.4%        | 2,232.9           | 17.8%       |
| <b>2002</b>  | 10.4               | 27.9%        | 2,148.7           | 15.1%       |
| <b>2003</b>  | 7.4                | 26.0%        | 2,588.3           | 15.7%       |
| <b>2004</b>  | 10.2               | 36.4%        | 2,617.6           | 14.0%       |
| <b>2005</b>  | 29.2               | 33.5%        | 3,481.5           | 16.6%       |
| <b>2006</b>  | 17.1               | 25.1%        | 3,859.7           | 16.9%       |
| <b>2007</b>  | 16.1               | 25.2%        | 4,373.3           | 16.7%       |
| <b>2008</b>  | 12.3               | 26.9%        | 5,715.2           | 18.6%       |
| <b>2009</b>  | 16.1               | 25.8%        | 5,417.6           | 17.4%       |
| <b>2010</b>  | 25.0               | 32.5%        | 5,810.9           | 16.7%       |
| <b>2011</b>  | 24.0               | 31.4%        | 6,192.6           | 17.0%       |
| <b>2012</b>  | 26.5               | 33.7%        | 6,274.0           | 17.0%       |
| <b>2013</b>  | 39.5               | 36.2%        | 6,757.7           | 16.8%       |
| <b>2014</b>  | 39.9               | 37.0%        | 6,233.9           | 16.9%       |
| <b>2015</b>  | 51.7               | 45.0%        | 6,681.9           | 18.5%       |
| <b>Total</b> | 364.1              | 32.5%        | 72,439.5          | 17.0%       |

DAH, development assistance for health; DAMH, development assistance for mental health.

**Appendix 3. Annual philanthropic DAH for mental health and other health conditions between 2000 and 2015 (million, 2017 US\$)**

|                                                | 2000           | 2001           | 2002           | 2003           | 2004           | 2005           | 2006           | 2007           | 2008           | 2009           | 2010           | 2011           | 2012           | 2013           | 2014           | 2015           | Total           |
|------------------------------------------------|----------------|----------------|----------------|----------------|----------------|----------------|----------------|----------------|----------------|----------------|----------------|----------------|----------------|----------------|----------------|----------------|-----------------|
| <b>Mental Health</b>                           | 20.0           | 18.8           | 10.4           | 7.4            | 10.2           | 29.2           | 17.1           | 16.1           | 12.3           | 16.1           | 25.0           | 24.0           | 26.5           | 39.5           | 39.9           | 51.7           | 364.1           |
| HIV/AIDS                                       | 213.7          | 246.4          | 427.9          | 447.7          | 528.3          | 741.1          | 942.5          | 1,074.8        | 1,389.5        | 1,104.0        | 1,174.6        | 1,027.8        | 996.1          | 671.4          | 671.3          | 621.8          | 12,278.9        |
| Tuberculosis                                   | 28.8           | 34.8           | 42.4           | 56.6           | 75.6           | 68.4           | 145.0          | 216.5          | 306.1          | 268.0          | 307.9          | 279.7          | 287.6          | 236.0          | 201.0          | 240.4          | 2,794.8         |
| Malaria                                        | 51.1           | 44.0           | 22.8           | 43.2           | 82.5           | 124.6          | 132.8          | 219.8          | 310.4          | 249.3          | 245.2          | 210.3          | 199.4          | 185.3          | 153.0          | 178.2          | 2,451.9         |
| Other Infectious Diseases                      | 141.8          | 134.5          | 97.5           | 108.0          | 113.0          | 122.7          | 128.8          | 176.5          | 283.7          | 249.7          | 252.8          | 291.1          | 271.5          | 289.9          | 398.3          | 356.9          | 3,416.8         |
| Maternal Health                                | 386.7          | 390.0          | 278.7          | 296.8          | 256.6          | 309.5          | 336.5          | 399.6          | 415.3          | 520.8          | 509.6          | 599.9          | 549.4          | 497.2          | 503.9          | 543.2          | 6,793.8         |
| Newborn and Child Health                       | 591.9          | 680.3          | 543.3          | 856.4          | 700.6          | 976.0          | 890.4          | 1,086.7        | 1,272.8        | 1,287.5        | 1,513.4        | 1,739.1        | 1,964.6        | 2,156.3        | 1,909.1        | 2,241.5        | 20,409.9        |
| Non-communicable Diseases (excl mental health) | 56.8           | 67.8           | 70.3           | 83.7           | 80.1           | 82.7           | 118.3          | 128.7          | 183.6          | 186.9          | 214.9          | 183.5          | 173.8          | 233.9          | 240.0          | 276.7          | 2,381.6         |
| Health Sector Programme Support                | 186.8          | 205.4          | 176.6          | 214.1          | 212.1          | 254.9          | 232.8          | 231.1          | 441.4          | 484.3          | 557.4          | 544.6          | 541.9          | 752.0          | 676.0          | 735.1          | 6,446.5         |
| Other Health Focus Areas                       | 376.0          | 410.9          | 478.8          | 474.5          | 558.7          | 772.3          | 915.5          | 823.6          | 1,100.1        | 1,050.9        | 1,010.1        | 1,292.6        | 1,263.3        | 1,696.2        | 1,441.3        | 1,436.3        | 15,101.1        |
| <b>Total</b>                                   | <b>2,053.6</b> | <b>2,232.9</b> | <b>2,148.7</b> | <b>2,588.3</b> | <b>2,617.6</b> | <b>3,481.5</b> | <b>3,859.7</b> | <b>4,373.3</b> | <b>5,715.2</b> | <b>5,417.6</b> | <b>5,810.9</b> | <b>6,192.6</b> | <b>6,274.0</b> | <b>6,757.7</b> | <b>6,233.9</b> | <b>6,681.9</b> | <b>72,439.5</b> |

DAH, development assistance for health; DAMH, development assistance for mental health; HIV/AIDS, human immunodeficiency virus infection and acquired immune deficiency syndrome.

**Appendix 4. Annual philanthropic DAMH and annual philanthropic DAH between 2000 and 2015, by channel organisation (million, 2017 US\$)**

|                           | 2000    | 2001    | 2002    | 2003    | 2004    | 2005    | 2006    | 2007    | 2008    | 2009    | 2010    | 2011    | 2012    | 2013    | 2014    | 2015    | Total    |
|---------------------------|---------|---------|---------|---------|---------|---------|---------|---------|---------|---------|---------|---------|---------|---------|---------|---------|----------|
| <b>Philanthropic DAMH</b> |         |         |         |         |         |         |         |         |         |         |         |         |         |         |         |         |          |
| Bilateral GOs             | 0.0     | 0.0     | 0.0     | 0.0     | 0.0     | 0.0     | 0.0     | 0.0     | 0.0     | 0.0     | 0.0     | 0.0     | 0.0     | 0.0     | 0.0     | 0.0     | 0.0      |
| Multilateral GOs          | 5.9     | 5.8     | 1.1     | 1.1     | 0.8     | 0.7     | 0.9     | 0.9     | 0.0     | 0.0     | 0.0     | 0.0     | 3.0     | 3.3     | 3.0     | 4.5     | 30.9     |
| Multilateral DFIs         | 0.0     | 0.0     | 0.0     | 0.0     | 0.0     | 0.0     | 0.0     | 0.0     | 0.0     | 0.0     | 0.0     | 0.0     | 0.0     | 0.0     | 0.0     | 0.0     | 0.0      |
| US Foundations            | 6.5     | 4.8     | 5.8     | 3.3     | 4.9     | 2.6     | 2.1     | 1.9     | 3.0     | 4.0     | 3.8     | 3.0     | 9.0     | 6.1     | 11.2    | 7.2     | 79.3     |
| NGOs                      | 7.6     | 8.2     | 3.5     | 3.0     | 4.5     | 25.9    | 14.1    | 13.2    | 9.3     | 12.1    | 21.2    | 21.0    | 14.5    | 30.1    | 25.8    | 40.0    | 254.0    |
| GHIs                      | 0.0     | 0.0     | 0.0     | 0.0     | 0.0     | 0.0     | 0.0     | 0.0     | 0.0     | 0.0     | 0.0     | 0.0     | 0.0     | 0.0     | 0.0     | 0.0     | 0.0      |
| Sub-Total                 | 20.0    | 18.8    | 10.4    | 7.4     | 10.2    | 29.2    | 17.1    | 16.1    | 12.3    | 16.1    | 25.0    | 24.0    | 26.5    | 39.5    | 39.9    | 51.7    | 364.1    |
| <b>Philanthropic DAH</b>  |         |         |         |         |         |         |         |         |         |         |         |         |         |         |         |         |          |
| Bilateral GOs             | 0.0     | 0.0     | 0.0     | 0.0     | 0.0     | 0.0     | 0.0     | 0.0     | 0.0     | 0.0     | 0.0     | 0.0     | 0.0     | 0.0     | 0.0     | 0.0     | 0.0      |
| Multilateral GOs          | 317.6   | 364.9   | 272.8   | 269.0   | 339.8   | 413.1   | 423.4   | 477.8   | 624.3   | 628.9   | 847.8   | 920.8   | 675.4   | 729.6   | 675.3   | 920.9   | 8,901.3  |
| Multilateral DFIs         | 0.0     | 0.0     | 0.0     | 0.0     | 0.0     | 0.0     | 0.0     | 0.0     | 0.0     | 0.0     | 0.0     | 0.0     | 0.0     | 0.0     | 0.0     | 0.0     | 0.0      |
| US Foundations            | 624.7   | 541.0   | 589.6   | 847.0   | 563.5   | 734.1   | 1,008.9 | 1,257.7 | 1,743.8 | 1,679.9 | 1,521.7 | 1,698.8 | 1,771.9 | 1,826.4 | 1,888.2 | 2,059.6 | 20,356.8 |
| NGOs                      | 1,107.9 | 1,182.4 | 1,284.9 | 1,449.1 | 1,678.7 | 2,200.1 | 2,341.5 | 2,401.8 | 3,099.5 | 2,887.1 | 3,201.4 | 3,147.0 | 3,381.0 | 3,666.2 | 3,240.5 | 3,065.2 | 39,334.2 |
| GHIs                      | 3.4     | 144.6   | 1.4     | 23.2    | 35.7    | 134.1   | 86.0    | 236.0   | 247.6   | 221.6   | 239.9   | 426.0   | 445.8   | 535.6   | 429.9   | 636.2   | 3,847.2  |
| Sub-Total                 | 2,053.6 | 2,232.9 | 2,148.7 | 2,588.3 | 2,617.6 | 3,481.5 | 3,859.7 | 4,373.3 | 5,715.2 | 5,417.6 | 5,810.9 | 6,192.6 | 6,274.0 | 6,757.7 | 6,233.9 | 6,681.9 | 72,439.5 |

DAH, development assistance for health; DAMH, development assistance for mental health; DFIs, development finance institutions; GHIs, global health initiatives; GOs, governmental organisations; NGOs, non-governmental organisations; US, United States.

**Appendix 5. Cumulative philanthropic DAMH by the top 10 US foundations as channels between 2000 and 2015, by region and country income group (thousand, 2017 US\$)**

|                                      | <b>Philanthropic DAMH<br/>(US\$, thousand)</b> |
|--------------------------------------|------------------------------------------------|
| <b>Income Group</b>                  |                                                |
| <b>LIC</b>                           |                                                |
| Ford Foundation                      | 1,736                                          |
| David and Lucile Packard Foundation  | 727                                            |
| Rockefeller Foundation               | 447                                            |
| Open Society Fund                    | 425                                            |
| Foundation to Promote Open Society   | 257                                            |
| Draper Richards Kaplan Foundation    | 236                                            |
| Michael and Susan Dell Foundation    | 165                                            |
| Bristol-Myers Squibb Foundation, Inc | 143                                            |
| Mulago Foundation                    | 123                                            |
| James S. McDonnell Foundation        | 115                                            |
| <b>LMC</b>                           |                                                |
| Ford Foundation                      | 5,243                                          |
| Partridge Foundation                 | 2,011                                          |
| Open Society Fund                    | 1,418                                          |
| W. K. Kellogg Foundation             | 1,243                                          |
| Foundation to Promote Open Society   | 1,063                                          |
| China Medical Board, Inc             | 948                                            |
| James S. McDonnell Foundation        | 385                                            |
| Eli Lilly and Company Foundation     | 344                                            |
| Sorenson Legacy Foundation           | 310                                            |
| Abbott Fund                          | 292                                            |
| <b>UMC</b>                           |                                                |
| James S. McDonnell Foundation        | 2,913                                          |
| Foundation to Promote Open Society   | 2,100                                          |
| Open Society Fund                    | 1,834                                          |
| Ford Foundation                      | 990                                            |
| Greater Houston Community Foundation | 927                                            |
| China Medical Board, Inc             | 921                                            |
| MetLife Foundation                   | 920                                            |
| Alcoa Foundation                     | 470                                            |
| Harold K. L. Castle Foundation       | 223                                            |
| Paso del Norte Health Foundation     | 207                                            |
| <b>WHO Region</b>                    |                                                |
| <b>AFR</b>                           |                                                |
| Ford Foundation                      | 1,325                                          |
| Rockefeller Foundation               | 371                                            |
| David and Lucile Packard Foundation  | 350                                            |
| Draper Richards Kaplan Foundation    | 306                                            |
| Michael and Susan Dell Foundation    | 201                                            |
| Open Society Fund                    | 193                                            |
| Mulago Foundation                    | 161                                            |
| Oprah Winfrey Foundation             | 134                                            |
| Bristol-Myers Squibb Foundation, Inc | 124                                            |



|                                                  | <b>Philanthropic DAMH<br/>(US\$, thousand)</b> |
|--------------------------------------------------|------------------------------------------------|
| William and Flora Hewlett Foundation             | 115                                            |
| <b>AMR</b>                                       |                                                |
| James S. McDonnell Foundation                    | 2,978                                          |
| Foundation to Promote Open Society               | 2,452                                          |
| Open Society Fund                                | 2,020                                          |
| W. K. Kellogg Foundation                         | 1,435                                          |
| MetLife Foundation                               | 920                                            |
| Alcoa Foundation                                 | 482                                            |
| Harold K. L. Castle Foundation                   | 223                                            |
| Paso del Norte Health Foundation                 | 207                                            |
| Ford Foundation                                  | 195                                            |
| Dalio Foundation, Inc                            | 180                                            |
| <b>EMR</b>                                       |                                                |
| Ford Foundation                                  | 666                                            |
| Foundation to Promote Open Society               | 573                                            |
| Sorenson Legacy Foundation                       | 506                                            |
| David and Lucile Packard Foundation              | 416                                            |
| Open Society Fund                                | 269                                            |
| Eli Lilly and Company Foundation                 | 241                                            |
| Robert Wood Johnson Foundation                   | 112                                            |
| Alphawood Foundation                             | 104                                            |
| Draper Richards Kaplan Foundation                | 83                                             |
| Johnson & Johnson Family of Companies Foundation | 74                                             |
| <b>EUR</b>                                       |                                                |
| Open Society Fund                                | 862                                            |
| James S. McDonnell Foundation                    | 449                                            |
| Pfizer Foundation, Inc                           | 360                                            |
| Bristol-Myers Squibb Foundation, Inc             | 347                                            |
| Foundation to Promote Open Society               | 211                                            |
| Medtronic Foundation                             | 189                                            |
| Ford Foundation                                  | 156                                            |
| John D. and Catherine T. Macarthur Foundation    | 120                                            |
| Eli Lilly and Company Foundation                 | 112                                            |
| Charles Stewart Mott Foundation                  | 110                                            |
| <b>SEAR</b>                                      |                                                |
| Ford Foundation                                  | 671                                            |
| Open Society Fund                                | 291                                            |
| Abbott Fund                                      | 249                                            |
| Nike Foundation                                  | 235                                            |
| Robert Wood Johnson Foundation                   | 160                                            |
| David and Lucile Packard Foundation              | 156                                            |
| Foundation to Promote Open Society               | 144                                            |
| Annie E. Casey Foundation                        | 116                                            |
| Rockefeller Foundation                           | 79                                             |
| Alphawood Foundation                             | 42                                             |
| <b>WPR</b>                                       |                                                |
| Ford Foundation                                  | 4,956                                          |
| Partridge Foundation                             | 2,011                                          |
| China Medical Board, Inc                         | 1,869                                          |
| Greater Houston Community Foundation             | 927                                            |
| Bloomberg Philanthropies                         | 173                                            |

|                                                  | <b>Philanthropic DAMH<br/>(US\$, thousand)</b> |
|--------------------------------------------------|------------------------------------------------|
| UPS Foundation                                   | 157                                            |
| Starr Foundation                                 | 141                                            |
| Timken Foundation of Canton                      | 84                                             |
| Johnson & Johnson Family of Companies Foundation | 68                                             |
| Rockefeller Foundation                           | 63                                             |
| <b>Multiple Regions</b>                          |                                                |
| Simons Foundation                                | 7,087                                          |
| Oak Foundation U.S.A.                            | 5,554                                          |
| Conrad N. Hilton Foundation                      | 3,560                                          |
| Foundation to Promote Open Society               | 2,088                                          |
| Open Society Fund                                | 1,929                                          |
| Carmel Hill Fund                                 | 1,864                                          |
| Skoll Foundation                                 | 1,532                                          |
| Silicon Valley Community Foundation              | 1,481                                          |
| Eli Lilly and Company Foundation                 | 1,216                                          |
| MetLife Foundation                               | 1,088                                          |
| Robert Wood Johnson Foundation                   | 826                                            |
| Stewardship Foundation                           | 715                                            |
| <b>Unallocated/Unspecified</b>                   |                                                |
| Ford Foundation                                  | 2,525                                          |
| James S. McDonnell Foundation                    | 1,697                                          |
| Bill & Melinda Gates Foundation                  | 1,513                                          |
| Rockefeller Brothers Fund, Inc                   | 468                                            |
| Alcoa Foundation                                 | 407                                            |
| John D. and Catherine T. Macarthur Foundation    | 391                                            |
| Draper Richards Kaplan Foundation                | 334                                            |
| Schmidt Family Foundation                        | 279                                            |
| Pfizer Foundation, Inc                           | 224                                            |
| Sall Family Foundation, Inc                      | 128                                            |
| Helen Bader Foundation, Inc                      | 112                                            |
| State Street Foundation                          | 105                                            |

The table reports philanthropic DAMH disbursed by US foundations as channels (i.e. intermediary organisations disbursing funding to implementing institutions providing support in low- and middle-income countries). It is worth noting that a much larger amount could have been disbursed by US foundations through other channels (e.g. non-governmental organisations and United Nations agencies). DAMH, development assistance for mental health; AFR, African region; AMR, region of the Americas; EMR, Eastern Mediterranean region; EUR, European Region; SEAR, South-East Asia region; WPR, Western Pacific region; LIC, low-income countries; LMC, lower middle-income countries; UMC, upper middle-income countries.

**Appendix 6. Cumulative philanthropic DAMH and philanthropic DAH between 2000 and 2015, by region, country income group, country (thousand, 2017 US\$)**

|                          | Philanthropic DAMH |              | Philanthropic DAH |             |
|--------------------------|--------------------|--------------|-------------------|-------------|
|                          | US\$ (thousand)    | % Total DAMH | US\$ (thousand)   | % Total DAH |
| <b>Total</b>             | 364,134.6          | 32.5%        | 72,439,528.0      | 17.0%       |
| <b>Income Group</b>      |                    |              |                   |             |
| LIC                      | 5,485.4            | 5.0%         | 5,132,183.0       | 4.4%        |
| LMC                      | 15,659.7           | 12.3%        | 4,498,688.5       | 5.6%        |
| UMC                      | 13,998.3           | 25.8%        | 1,318,289.9       | 3.7%        |
| HIC                      | 38.4               | 78.5%        | 1,768.2           | 17.6%       |
| <b>WHO Region</b>        |                    |              |                   |             |
| AFR                      | 3,867.3            | 4.7%         | 5,718,036.5       | 4.6%        |
| AMR                      | 11,807.0           | 33.7%        | 1,023,675.8       | 3.4%        |
| EMR                      | 3,226.9            | 3.7%         | 927,386.6         | 4.5%        |
| EUR                      | 3,095.4            | 7.7%         | 311,805.8         | 2.9%        |
| SEAR                     | 2,305.0            | 11.6%        | 2,118,801.3       | 7.5%        |
| WPR                      | 10,880.3           | 42.5%        | 851,223.3         | 4.7%        |
| <b>Country</b>           |                    |              |                   |             |
| Afghanistan              | 408.7              | 1.7%         | 94,195.7          | 2.7%        |
| Albania                  | 189.1              | 4.9%         | 11,487.3          | 3.2%        |
| Algeria                  | 6.7                | 1.1%         | 1,086.4           | 1.8%        |
| Angola                   | 4.5                | 1.0%         | 66,392.0          | 4.5%        |
| Antigua and Barbuda      | 188.1              | 98.5%        | 313.0             | 6.6%        |
| Argentina                | 348.4              | 68.1%        | 34,063.2          | 0.9%        |
| Armenia                  | 1.3                | 0.2%         | 6,993.8           | 1.8%        |
| Azerbaijan               | 1.1                | 0.2%         | 10,192.5          | 3.3%        |
| Bahrain                  | 0.0                | -            | 0.0               | 0.0%        |
| Bangladesh               | 14.6               | 1.0%         | 317,378.9         | 6.9%        |
| Barbados                 | 0.0                | -            | 5.8               | 0.0%        |
| Belarus                  | 2.7                | 3.6%         | 8,260.7           | 5.3%        |
| Belize                   | 99.2               | 74.2%        | 3,681.8           | 6.0%        |
| Benin                    | 2.0                | 0.9%         | 53,032.8          | 3.9%        |
| Bhutan                   | 0.1                | 0.9%         | 3,699.9           | 4.8%        |
| Bolivia                  | 408.8              | 10.3%        | 45,243.5          | 3.5%        |
| Bosnia and Herzegovina   | 813.1              | 5.6%         | 10,098.0          | 2.2%        |
| Botswana                 | 0.0                | -            | 92,161.1          | 5.5%        |
| Brazil                   | 1,854.1            | 34.5%        | 108,092.7         | 3.2%        |
| Bulgaria                 | 0.0                | -            | 4,838.5           | 1.1%        |
| Burkina Faso             | 2.6                | 1.4%         | 99,125.9          | 5.4%        |
| Burundi                  | 38.5               | 1.0%         | 48,216.0          | 4.3%        |
| Cambodia                 | 46.1               | 0.9%         | 97,067.5          | 4.1%        |
| Cameroon                 | 177.7              | 26.2%        | 89,223.5          | 6.5%        |
| Cape Verde               | 0.0                | -            | 930.7             | 0.5%        |
| Central African Republic | 3.6                | 0.9%         | 18,448.4          | 5.5%        |
| Chad                     | 13.7               | 2.9%         | 34,505.7          | 4.9%        |
| Chile                    | 1,573.5            | 87.6%        | 9,716.1           | 8.6%        |

|                                  | Philanthropic DAMH |                 | Philanthropic DAH  |                |
|----------------------------------|--------------------|-----------------|--------------------|----------------|
|                                  | US\$<br>(thousand) | % Total<br>DAMH | US\$<br>(thousand) | % Total<br>DAH |
| China                            | 6,329.3            | 80.1%           | 411,860.8          | 9.6%           |
| Colombia                         | 664.8              | 47.2%           | 82,663.2           | 2.3%           |
| Comoros                          | 0.0                | -               | 2,908.3            | 3.0%           |
| Congo (Brazzaville)              | 0.6                | 10.5%           | 13,023.5           | 5.4%           |
| Costa Rica                       | 113.0              | 62.7%           | 4,269.2            | 3.2%           |
| Cote d'Ivoire                    | 28.1               | 1.5%            | 71,733.1           | 3.7%           |
| Croatia                          | 0.0                | 0.0%            | 268.0              | 0.3%           |
| Cuba                             | 41.1               | 5.3%            | 10,840.0           | 4.7%           |
| Czech Republic                   | 0.0                | -               | 320.1              | 100.0%         |
| Democratic Republic of the Congo | 221.5              | 1.6%            | 290,804.2          | 5.2%           |
| Djibouti                         | 0.0                | -               | 5,482.3            | 3.0%           |
| Dominica                         | 0.0                | -               | 327.9              | 4.1%           |
| Dominican Republic               | 59.7               | 8.2%            | 29,296.5           | 2.0%           |
| Ecuador                          | 197.8              | 29.6%           | 38,981.8           | 5.9%           |
| Egypt                            | 354.1              | 9.6%            | 44,569.3           | 3.0%           |
| El Salvador                      | 877.3              | 95.5%           | 19,484.9           | 3.0%           |
| Equatorial Guinea                | 0.0                | -               | 3,085.5            | 5.3%           |
| Eritrea                          | 2.1                | 0.9%            | 22,054.6           | 4.1%           |
| Estonia                          | 0.0                | -               | 202.6              | 2.7%           |
| Ethiopia                         | 287.3              | 14.5%           | 617,481.4          | 6.1%           |
| Federated States of Micronesia   | 0.0                | -               | 1,600.8            | 0.6%           |
| Fiji                             | 0.0                | 0.0%            | 2,554.7            | 1.5%           |
| Gabon                            | 0.0                | -               | 7,727.8            | 6.0%           |
| Georgia                          | 7.1                | 0.2%            | 10,760.8           | 1.9%           |
| Ghana                            | 53.5               | 2.3%            | 224,224.5          | 5.6%           |
| Grenada                          | 232.9              | 98.6%           | 832.9              | 8.2%           |
| Guatemala                        | 127.2              | 78.0%           | 48,866.5           | 3.2%           |
| Guinea                           | 0.0                | 10.5%           | 48,181.0           | 4.9%           |
| Guinea-Bissau                    | 2.5                | 0.9%            | 11,619.4           | 3.7%           |
| Guyana                           | 11.3               | 4.9%            | 9,187.1            | 2.4%           |
| Haiti                            | 256.9              | 29.4%           | 106,615.6          | 3.5%           |
| Honduras                         | 448.3              | 12.7%           | 38,122.2           | 3.5%           |
| Hungary                          | 243.4              | 100.0%          | 4,296.7            | 56.0%          |
| India                            | 1,257.0            | 24.4%           | 1,368,016.4        | 10.2%          |
| Indonesia                        | 485.6              | 27.4%           | 163,044.1          | 3.3%           |
| Iran                             | 212.3              | 86.2%           | 8,573.0            | 3.4%           |
| Iraq                             | 6.1                | 0.8%            | 8,440.9            | 0.5%           |
| Jamaica                          | 51.9               | 74.2%           | 12,333.0           | 3.2%           |
| Jordan                           | 284.3              | 13.2%           | 10,883.1           | 1.2%           |
| Kazakhstan                       | 30.9               | 11.5%           | 9,494.2            | 2.0%           |
| Kenya                            | 1,300.6            | 34.9%           | 434,123.8          | 4.2%           |
| Kiribati                         | 0.0                | 0.0%            | 659.7              | 0.9%           |
| Kosovo                           | 54.0               | 1.7%            | 3,725.1            | 3.0%           |
| Kyrgyzstan                       | 62.9               | 28.3%           | 13,873.4           | 2.1%           |
| Laos                             | 30.1               | 9.8%            | 25,829.2           | 3.1%           |
| Latvia                           | 0.0                | -               | 114.0              | 0.1%           |
| Lebanon                          | 31.7               | 0.7%            | 5,489.2            | 2.4%           |
| Lesotho                          | 21.3               | 92.3%           | 26,566.8           | 2.9%           |
| Liberia                          | 137.5              | 7.4%            | 92,861.2           | 6.9%           |

|                                     | Philanthropic DAMH |                 | Philanthropic DAH  |                |
|-------------------------------------|--------------------|-----------------|--------------------|----------------|
|                                     | US\$<br>(thousand) | % Total<br>DAMH | US\$<br>(thousand) | % Total<br>DAH |
| Libya                               | 4.9                | 0.7%            | 667.9              | 0.7%           |
| Lithuania                           | 0.0                | -               | 78.9               | 0.3%           |
| Macedonia                           | 2.8                | 1.3%            | 3,989.3            | 2.4%           |
| Madagascar                          | 17.6               | 0.9%            | 74,886.7           | 4.6%           |
| Malawi                              | 125.2              | 1.3%            | 199,058.0          | 4.3%           |
| Malaysia                            | 80.6               | 43.2%           | 5,975.8            | 9.3%           |
| Maldives                            | 0.0                | -               | 406.9              | 2.4%           |
| Mali                                | 51.8               | 8.5%            | 108,199.0          | 4.7%           |
| Marshall Islands                    | 0.0                | -               | 1,627.5            | 1.3%           |
| Mauritania                          | 0.0                | -               | 10,708.2           | 4.0%           |
| Mauritius                           | 0.0                | -               | 986.7              | 5.7%           |
| Mexico                              | 3,361.6            | 90.0%           | 214,112.6          | 6.3%           |
| Moldova                             | 668.8              | 8.9%            | 20,095.9           | 4.0%           |
| Mongolia                            | 5.2                | 0.4%            | 6,861.6            | 1.8%           |
| Montenegro                          | 8.6                | 2.8%            | 1,235.0            | 2.0%           |
| Morocco                             | 315.3              | 35.6%           | 22,383.1           | 1.4%           |
| Mozambique                          | 55.8               | 1.3%            | 171,316.4          | 2.3%           |
| Myanmar                             | 224.1              | 87.4%           | 89,266.4           | 6.8%           |
| Namibia                             | 18.8               | 11.3%           | 28,034.6           | 1.8%           |
| Nepal                               | 31.6               | 1.0%            | 67,265.7           | 3.6%           |
| Nicaragua                           | 115.8              | 15.6%           | 40,251.0           | 3.0%           |
| Niger                               | 10.1               | 1.1%            | 62,211.8           | 5.5%           |
| Nigeria                             | 312.2              | 17.8%           | 892,400.7          | 7.2%           |
| North Korea                         | 0.3                | 0.4%            | 14,018.2           | 8.3%           |
| Oman                                | 0.0                | -               | 0.0                | 0.0%           |
| Pakistan                            | 632.4              | 48.4%           | 501,260.1          | 8.7%           |
| Palau                               | 0.0                | -               | 199.8              | 1.1%           |
| Palestine                           | 813.0              | 2.0%            | 12,146.5           | 1.2%           |
| Panama                              | 10.2               | 29.8%           | 5,176.1            | 2.1%           |
| Papua New Guinea                    | 0.0                | -               | 34,662.1           | 2.0%           |
| Paraguay                            | 16.1               | 3.7%            | 10,540.4           | 3.4%           |
| Peru                                | 513.6              | 11.7%           | 139,581.8          | 7.5%           |
| Philippines                         | 3,744.5            | 84.6%           | 68,001.1           | 2.5%           |
| Poland                              | 228.4              | 100.0%          | 4,045.4            | 8.7%           |
| Romania                             | 202.8              | 100.0%          | 11,421.2           | 1.2%           |
| Russia                              | 336.6              | 100.0%          | 38,840.5           | 4.9%           |
| Rwanda                              | 103.7              | 1.0%            | 165,849.8          | 4.3%           |
| Saint Kitts and Nevis               | 0.0                | -               | 141.7              | 2.0%           |
| Saint Lucia                         | 22.0               | 4.3%            | 1,009.2            | 1.7%           |
| Saint Vincent and the<br>Grenadines | 164.8              | 6.0%            | 593.9              | 3.2%           |
| Samoa                               | 0.0                | -               | 349.6              | 0.3%           |
| Sao Tome and Principe               | 0.0                | -               | 3,480.1            | 3.2%           |
| Saudi Arabia                        | 0.0                | -               | 1.1                | 0.2%           |
| Senegal                             | 6.6                | 1.0%            | 91,509.5           | 4.1%           |
| Serbia                              | 73.4               | 4.3%            | 9,314.6            | 2.3%           |
| Seychelles                          | 0.0                | -               | 363.2              | 3.4%           |
| Sierra Leone                        | 25.4               | 0.9%            | 70,217.8           | 6.6%           |
| Slovakia                            | 43.3               | 100.0%          | 161.4              | 0.4%           |
| Solomon Is.                         | 0.0                | 0.0%            | 3,756.6            | 1.1%           |

|                                 | Philanthropic DAMH |                 | Philanthropic DAH  |                |
|---------------------------------|--------------------|-----------------|--------------------|----------------|
|                                 | US\$<br>(thousand) | % Total<br>DAMH | US\$<br>(thousand) | % Total<br>DAH |
| Somalia                         | 4.6                | 1.0%            | 27,953.5           | 4.8%           |
| South Africa                    | 373.4              | 6.3%            | 344,333.3          | 3.9%           |
| South Korea                     | 0.0                | -               | 51.7               | 100.0%         |
| South Sudan                     | 0.1                | 10.5%           | 39,223.6           | 3.0%           |
| Sri Lanka                       | 81.9               | 1.2%            | 16,421.1           | 2.8%           |
| Sudan                           | 30.1               | 4.0%            | 113,264.6          | 8.3%           |
| Suriname                        | 25.4               | 99.2%           | 4,924.3            | 2.8%           |
| Swaziland                       | 0.1                | 0.9%            | 30,218.2           | 4.5%           |
| Syria                           | 69.5               | 1.0%            | 11,679.8           | 6.8%           |
| Tajikistan                      | 19.9               | 35.2%           | 17,941.1           | 3.0%           |
| Tanzania                        | 221.3              | 5.4%            | 364,214.2          | 3.5%           |
| Thailand                        | 190.9              | 27.6%           | 72,798.2           | 6.8%           |
| The Gambia                      | 0.1                | 2.5%            | 40,551.2           | 10.4%          |
| Timor Leste                     | 18.9               | 3.9%            | 6,485.4            | 2.4%           |
| Togo                            | 8.8                | 0.9%            | 27,858.2           | 6.3%           |
| Tonga                           | 0.0                | -               | 347.6              | 0.3%           |
| Trinidad and Tobago             | 0.0                | -               | 20.3               | 0.0%           |
| Tunisia                         | 59.8               | 16.3%           | 4,091.6            | 1.7%           |
| Turkey                          | 47.7               | 3.9%            | 28,336.9           | 2.6%           |
| Turkmenistan                    | 0.0                | -               | 2,528.5            | 1.8%           |
| Uganda                          | 68.1               | 3.0%            | 275,958.9          | 3.4%           |
| Ukraine                         | 57.2               | 14.3%           | 53,426.4           | 5.0%           |
| Uruguay                         | 17.4               | 3.9%            | 1,029.4            | 0.5%           |
| Uzbekistan                      | 0.2                | 0.2%            | 25,464.9           | 3.4%           |
| Vanuatu                         | 0.0                | 0.0%            | 3,254.7            | 1.8%           |
| Venezuela                       | 6.0                | 3.5%            | 3,358.5            | 2.8%           |
| Vietnam                         | 644.3              | 20.4%           | 186,562.1          | 4.5%           |
| Yemen                           | 0.1                | 8.2%            | 56,305.0           | 4.9%           |
| Zambia                          | 26.0               | 1.2%            | 215,219.6          | 3.4%           |
| Zimbabwe                        | 137.8              | 16.1%           | 131,719.4          | 4.0%           |
|                                 |                    |                 |                    |                |
| <b>Multiple Regions</b>         | 35,010.1           | 66.4%           | 4,700,082.5        | 8.0%           |
| <b>Unallocated/ Unspecified</b> | 293,942.7          | 37.8%           | 56,788,516.0       | 41.6%          |

DAH, development assistance for health; DAMH, development assistance for mental health; AFR, African region; AMR, region of the Americas; EMR, Eastern Mediterranean region; EUR, European region; SEAR, South-East Asia region; WPR, Western Pacific region; LIC, low-income countries; LMC, lower middle-income countries; UMC, upper middle-income countries.
